# Supplementary material for: Pyridine-based cross-linked chitosan: a biopolymer adsorbent for the green removal of toxic metals from water
Source: Research Square preprint supplement (doi:10.21203/rs.3.rs-266015/v2), 2022-06-08
Supplement: Supplementary file 1 [file 3ef471b1a36253d91b7a0d86.docx]

**Supplementary information**

Pyridine based cross-linked chitosan: a biopolymer adsorbent for the green removal of toxic metals from water

*Ibraheem Olayiwola Bisiriyu and Reinout Meijboom*

*Department of Chemical Sciences, University of Johannesburg, PO Box 524, Auckland Park,*

*Johannesburg 2006, South Africa.*

*Email:* [*rmeijboom@uj.ac.za*](mailto:rmeijboom@uj.ac.za)*, bisiriyy@yahoo.com*

**Materials and instrumentations**

Pyridine-2,6-dicarboxylic acid (PDC) and chitosan (obtained from crab shell) were acquired from Sigma-Aldrich. Cr(NO3)3·9H2O, MnCl2·4H2O, NiCl2, CdCl2·H2O, (CH3COO)2Pb·3H2O and Cu(NO3)2·2.5H2O which were used as the source of the metal ions were of analytical reagent grade likewise other substances.

Chitosan and 2,6-pyridinedicarboxylic acid cross-linked chitosan (PDC-CCS) have been characterized using the following instrumental analysis: 1H NMR, 13C NMR, UV-visible spectroscopy, FT-IR spectroscopy, elemental analysis, powdered x-ray diffraction spectroscopy, BET, scanning electron microscopy (SEM), thermogravimetric analysis (TGA) and differential scanning calorimetry (DSC).

The 1H NMR spectra of chitosan and PDC-CCS were recorded on a 500MHz Bruker Avance spectrometer.

UV-vis spectra were collected on a Shimadzu UV-1800 spectrophotometer while FTIR analysis of chitosan and PDC-CCS was performed using a Shimadzu IRAffinity-1S.

A Thermo Scientific FLASH 2000 organic elemental analyzer (CHNS-O ANALYZER) was used for the elemental analysis. The carbon to nitrogen ratio was used to confirm crosslinking.

Bradford assay was performed to determine the extent of crosslinking of chitosan where the number of the free amino functional groups in chitosan before crosslinking (Cb) and after crosslinking (Ca) is expected to be a function of the solution absorbance. The percentage degree of cross-linking was calculated from the equation:

|  |  |  |
| --- | --- | --- |

Where Cb is a measure of the number of the free amino functional groups before crosslinking chitosan and Ca is a measure of the number of the free amino groups in crosslinked chitosan.

X-ray diffraction patterns for chitosan and cross-linked chitosan were analyzed with a Rigaku MiniFlex 600 diffractometer (Cu-Kα, 40 KV, 40 mA, λ = 1.5406 Å) at diffraction angle of 2θ = 4 – 60º

METTLER TOLEDO DSC822e and SDTQ600 thermogravimetric analyzer were used to study the thermal behavior and weight changes of the samples.

A Micromeritics ASAP 2460 was used for the porosity and surface area analysis. Before the analysis, streams of N2 gas were passed at 90 ℃ for about 6 h to degas the samples. Brunauer-Emmett-Teller (BET) technique was used for the surface area determination while the Barret-Joyner-Halenda (BJH) technique was employed in the determination of pore size and pore size distribution.

The surface morphology of the samples was confirmed using Tescan Vega 3 LMH Scanning electron microscopy (SEM).

|  |
| --- |
| ***Figure S1: Capacity of adsorption of PDC-CCS for Cr3+, Pb2+, Mn2+, Cd2+, and Ni2+ [at 30 ℃, pH 6.65, initial metal ion concentration of 2.5 mmol/l]*** |

|  |
| --- |
| ***Figure S2: Capacity of adsorption of PDC-CCS for Cr3+, Pb2+, Mn2+, Cd2+, and Ni2+ [at 30 ℃, pH 5.56, initial metal ion concentration of 2.5 mmol/l]*** |

|  |
| --- |
| ***Figure S3: Capacity of adsorption of PDC-CCS for Cr3+, Pb2+, Mn2+, Cd2+, and Ni2+ [at 30 ℃, pH 4.42, initial metal ion concentration of 2.5 mmol/l]*** |

|  |
| --- |
| ***Figure S4: Langmuir adsorption linear plot [at 30 ℃; shaking 60 mins; pH = 7.5 for Ni(II), Cd(II), and Mn(II); pH 4.42 for Pb(II) and Cr(III)*** |

|  |
| --- |
| ***Figure S5: Freundlich linear fit [at 30 ℃; shaking 60 mins; pH 7.5 for Ni(II), Cd(II), and Mn(II); pH 4.42 for Pb(II) and Cr(III)*** |

| 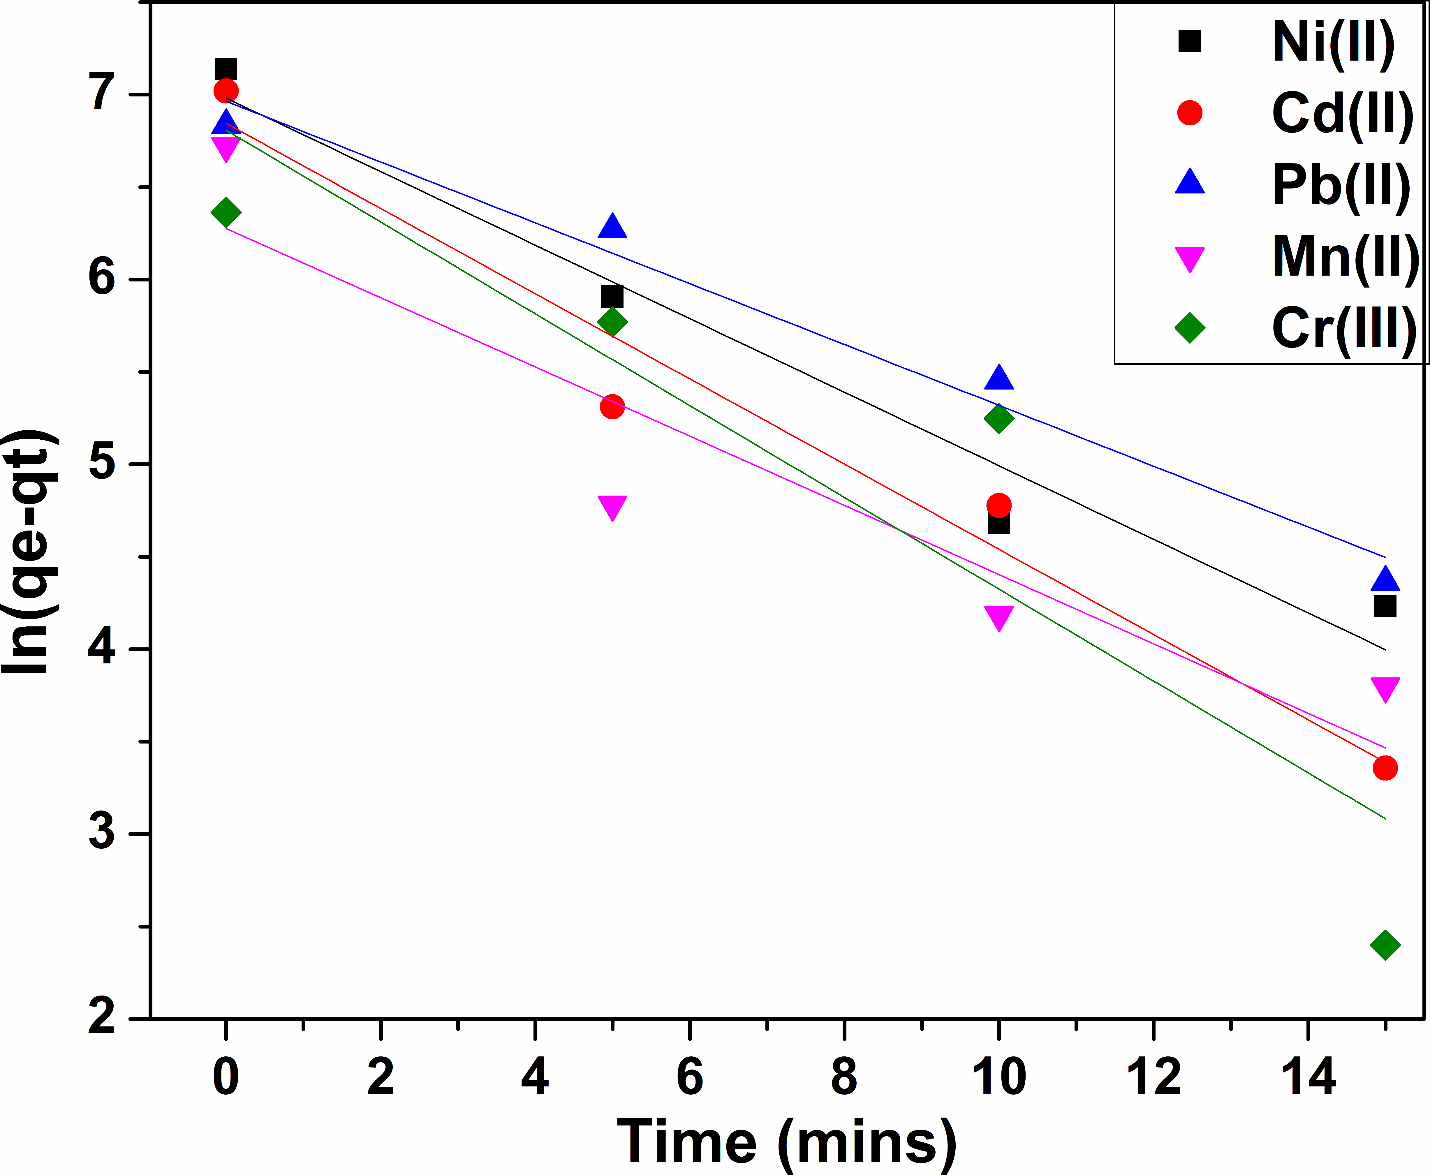 |
| --- |
| ***Figure S6: Pseudo-first-order kinetic linear fitting*** |

| 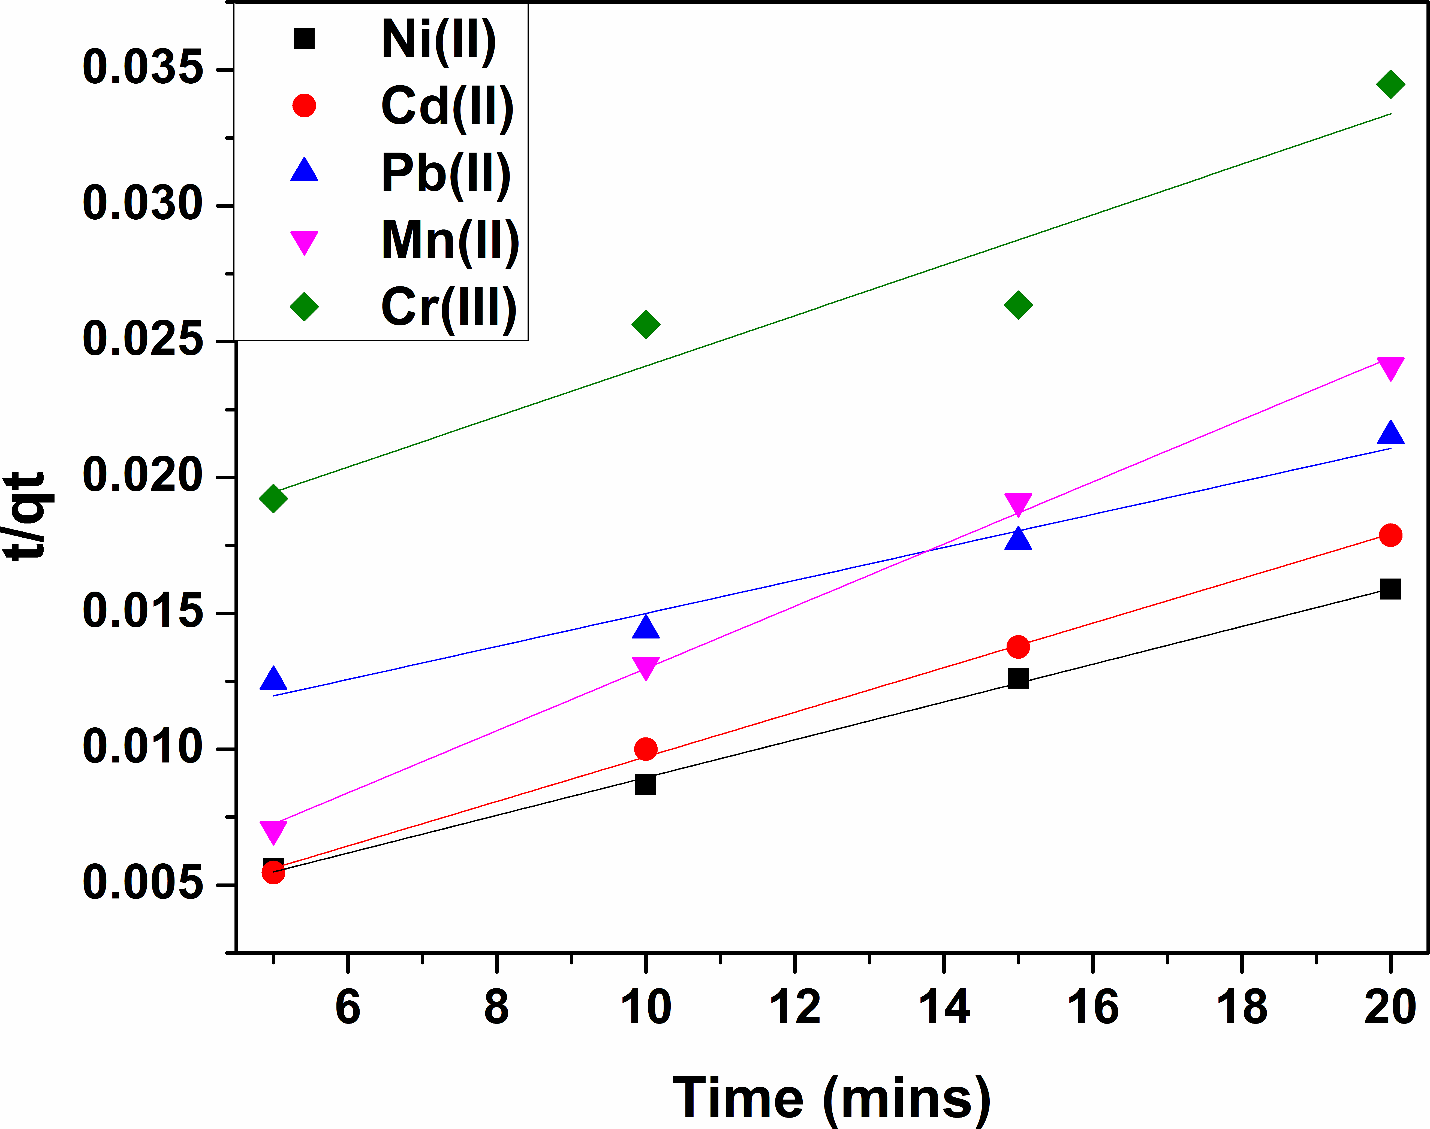 |
| --- |
| ***Figure S7: Pseudo-second-order kinetic linear fitting*** |

| 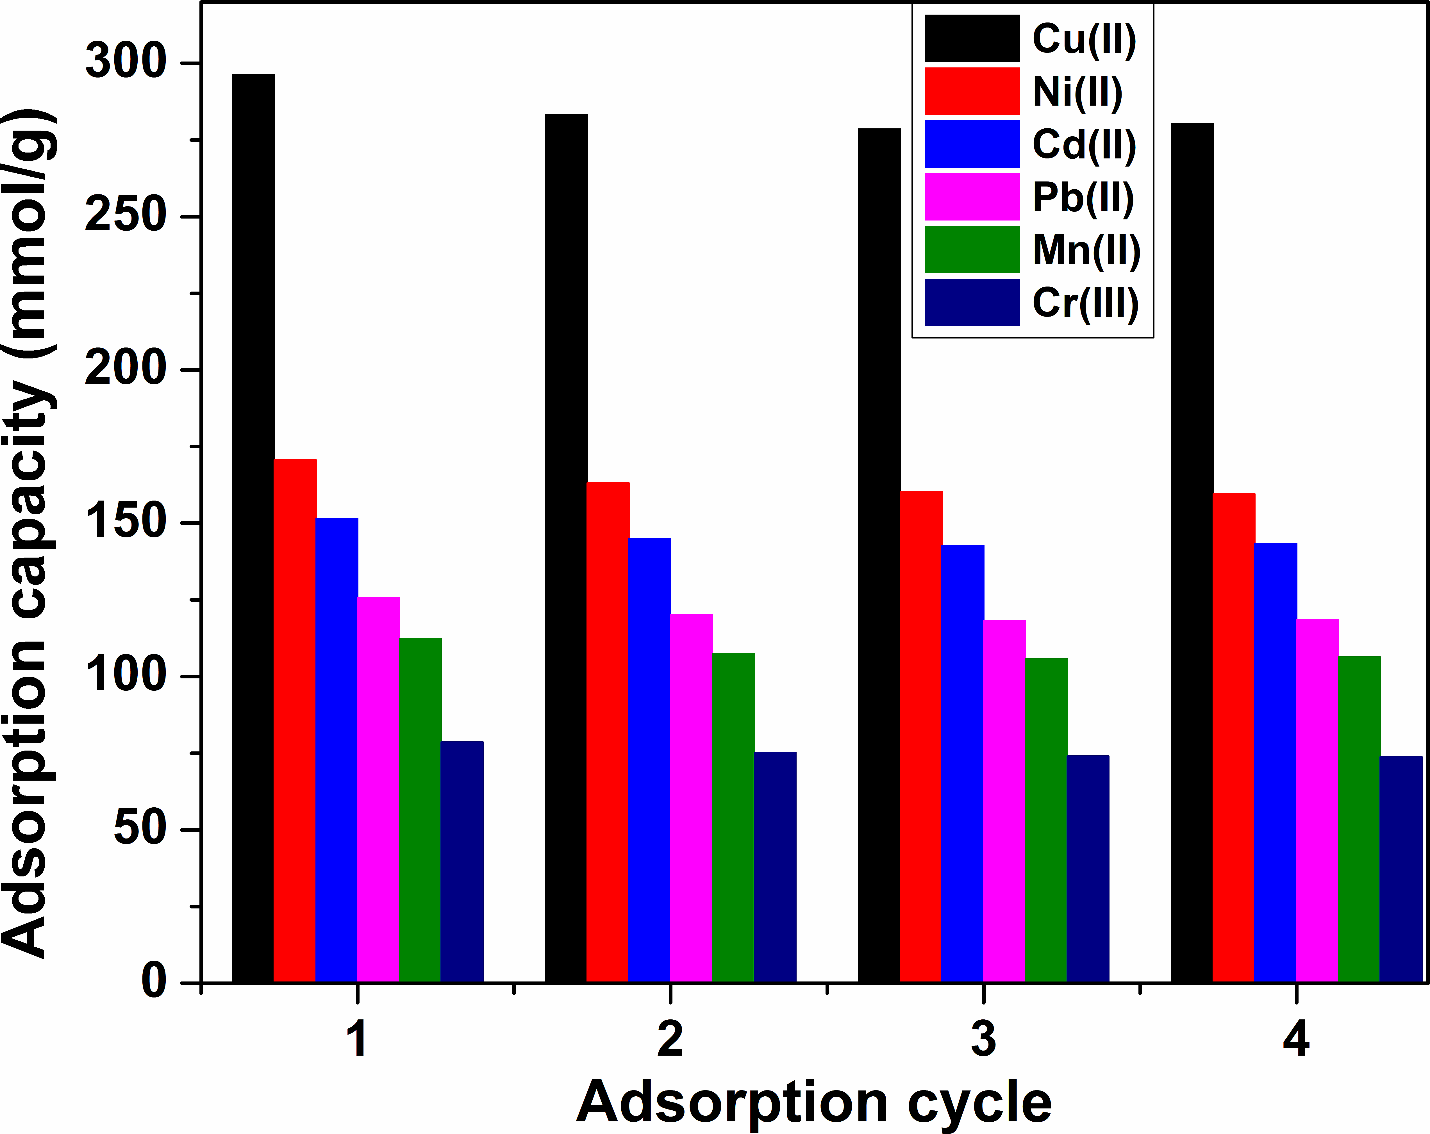 |
| --- |
| ***Figure S8: Reusability of the adsorbent for the removal of toxic metals from water[at 30 ℃; pH 5.5; shaking 60 mins; initial metal ion concentration 1.0 mM]*** |

| **Table S1: Parameters of Langmuir and Freundlich isotherms for the metal ions adsorption with PDC-CCS** | | | |
| --- | --- | --- | --- |
| **Langmuir** | | | |
| **Metal ions** | **KL (L/g)** | **Qm (mmol/g)** | **R2** |
| Cu(II) | 0.2433 | 2175.5163 | 0.9890 |
| Ni(II) | 0.2139 | 1412.6149 | 0.9291 |
| Cd(II) | 0.2091 | 1271.7790 | 0.9396 |
| Pb(II) | 0.2037 | 1073.9939 | 0.9395 |
| Mn(II) | 0.2008 | 970.8738 | 0.9386 |
| Cr(III) | 0.1932 | 699.3007 | 0.9383 |
| **Freundlich** | | | |
| **Metal ions** | **N (g/L)** | **KF (mmol/g)** | **R2** |
| Cu(II) | 0.6542 | 701.3240 | 0.9949 |
| Ni(II) | 0.6753 | 380.2580 | 0.9918 |
| Cd(II) | 0.6794 | 332.6131 | 0.9918 |
| Pb(II) | 0.6835 | 271.3854 | 0.9918 |
| Mn(II) | 0.6857 | 240.4543 | 0.9919 |
| Cr(III) | 0.6911 | 164.7271 | 0.9924 |

| **Table S2: Kinetic model parameters for adsorption of the metal ions on PDC-CCS** | | | | | | | |
| --- | --- | --- | --- | --- | --- | --- | --- |
| **Metal ions** | **Qe (exp)**  **(mmolg-1)** | **First-order kinetic model** | | | **Second-order kinetic model** | | |
| **K1 (min-1)** | **R2** | **Qe(cal) (mmolg-1)** | **K2 (gmol-1min-1)** | **R2** | **Qe (cal)**  **(mmolg-1)** |
| Cu(II)  Ni(II)  Cd(II) | 2185.64  1258.79  1118.70 | 0.2064  0.4581  0.5307 | 0.8773  0.9467  0.9491 | 659.7955  1075.9077  938.5161 | 7.0 x 10-4  2.4 x 10-4  4.43 x 10-4 | 0.9999  0.9971  0.9980 | 2193.3095  1438.6270  1218.7988 |
| Pb(II) | 928.52 | 0.3790 | 0.9699 | 1058.0681 | 4.14 x 10-5 | 0.9672 | 1645.9524 |
| Mn(II) | 829.62 | 0.4314 | 0.8019 | 531.6950 | 8.49 x 10-4 | 0.9970 | 877.1930 |
| Cr(III) | 580.21 | 0.5718 | 0.7475 | 904.1724 | 5.82 x 10-5 | 0.8807 | 1076.8830 |
